# Supplementary material
Source: PubMed Central journal article supplement (PMC8487929)
Supplement: NIHMS1717830-supplement-Figure_S1.pdf [file NIHMS1717830-supplement-Figure_S1.pdf]

# Figure S1

293T + GDF11 overexpression  
Mother  
Proband

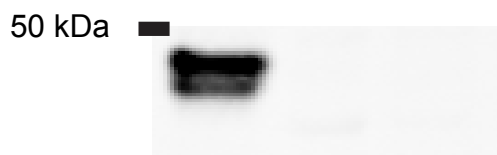

Abcam (ab14721), C-terminal, low exposure

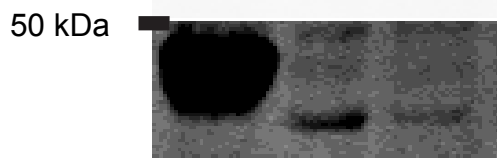

Abcam (ab14721), C-terminal, high exposure

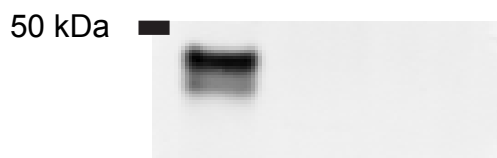

Thermo (PA5-11928), N-terminal, low exposure

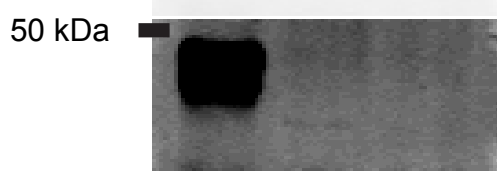

Thermo (PA5-11928), N-terminal, high exposure

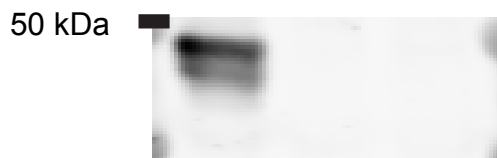

R+D Systems (MAB19581), C-terminal, low exposure

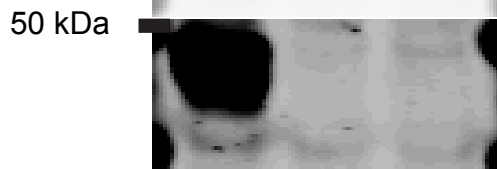

R+D Systems (MAB19581), C-terminal, high exposure

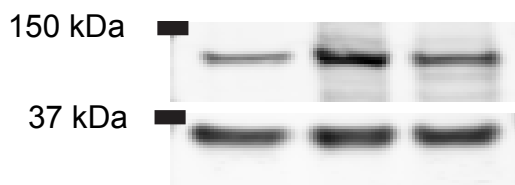

Vinculin

GAPDH
