# Supplementary material
Source: PubMed Central journal article supplement (PMC8487929)

Figure S2

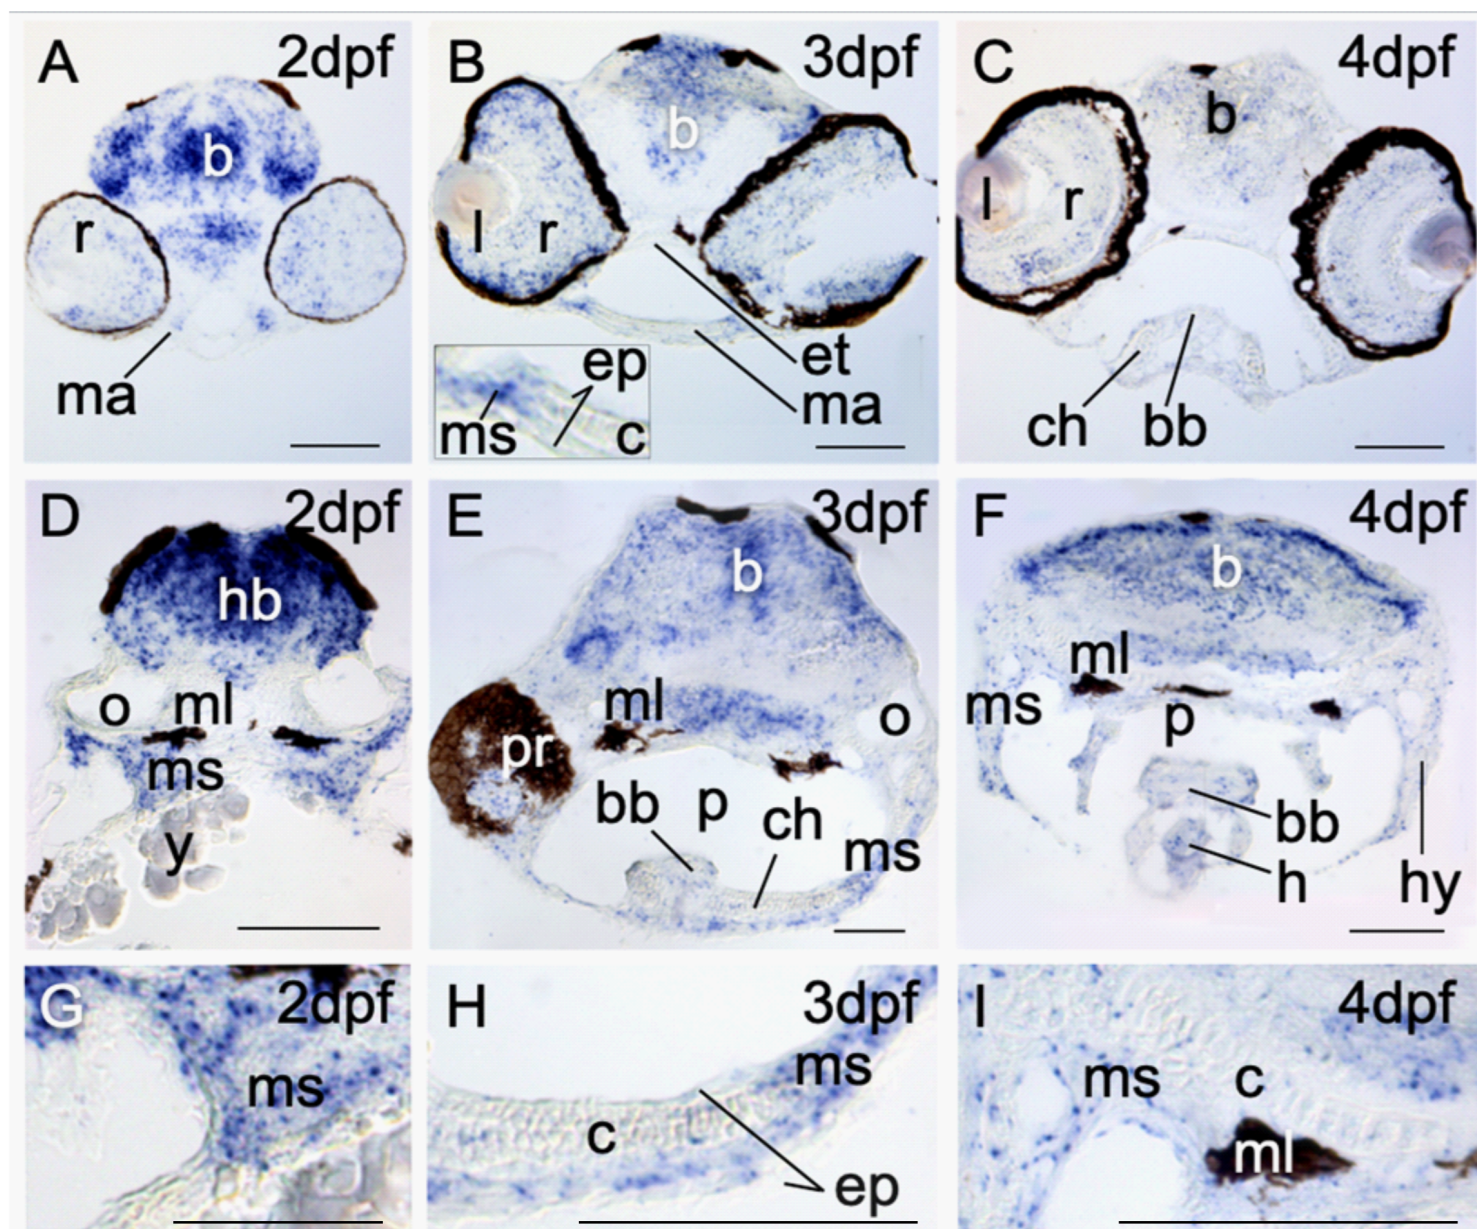

Supplement: NIHMS1717830-supplement-Figure_S2.pdf [file NIHMS1717830-supplement-Figure_S2.pdf]

Figure S3

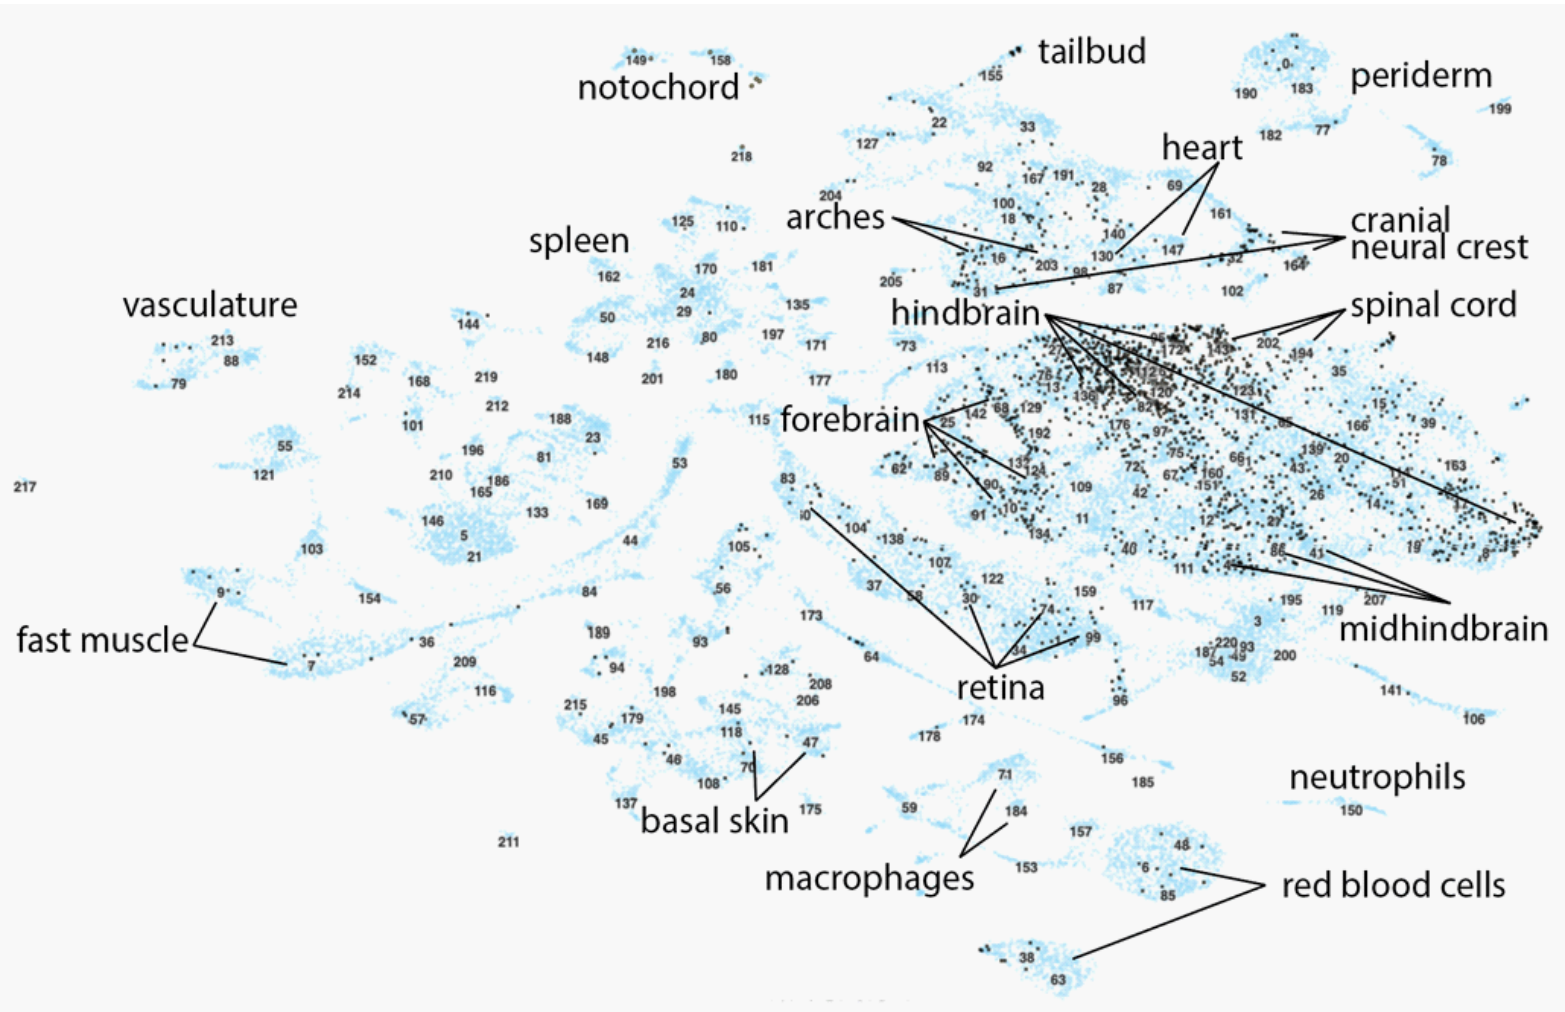

Supplement: NIHMS1717830-supplement-Figure_S3.pdf [file NIHMS1717830-supplement-Figure_S3.pdf]

# Figure S4

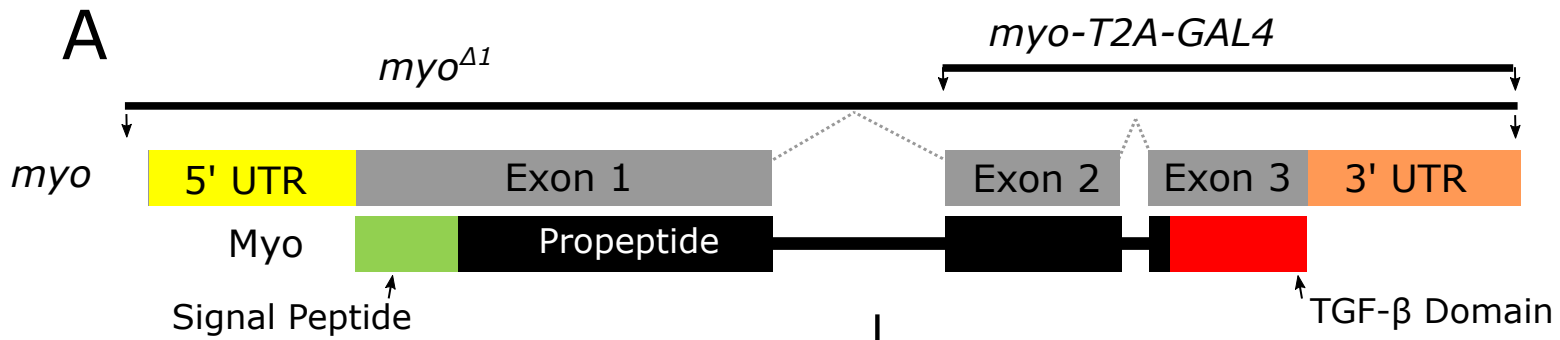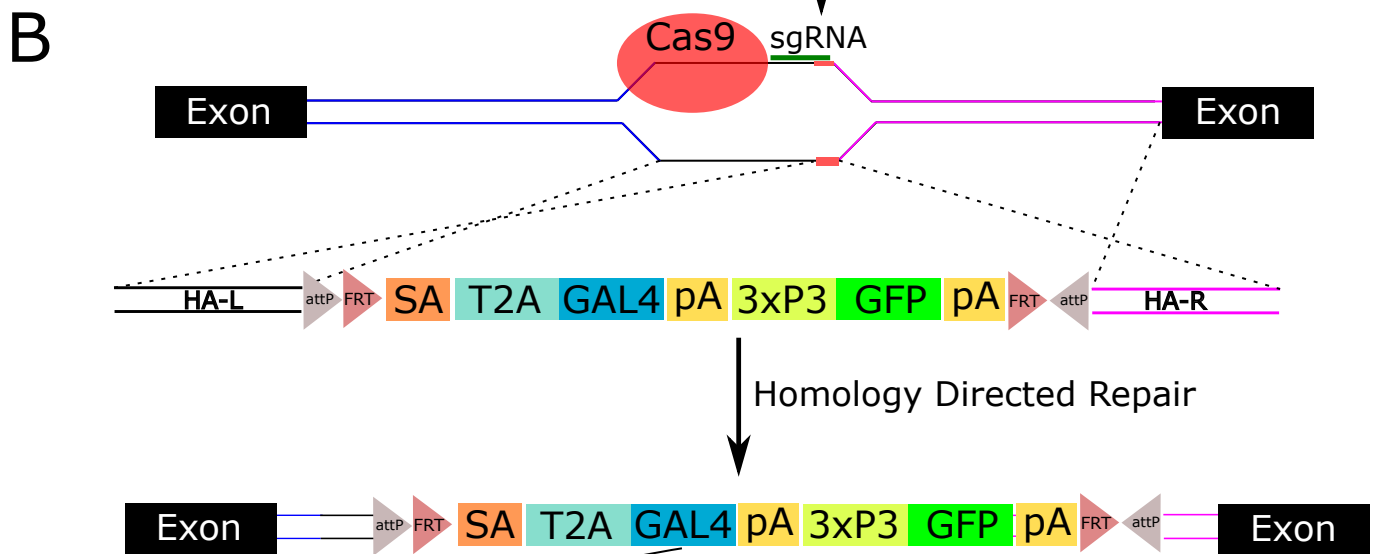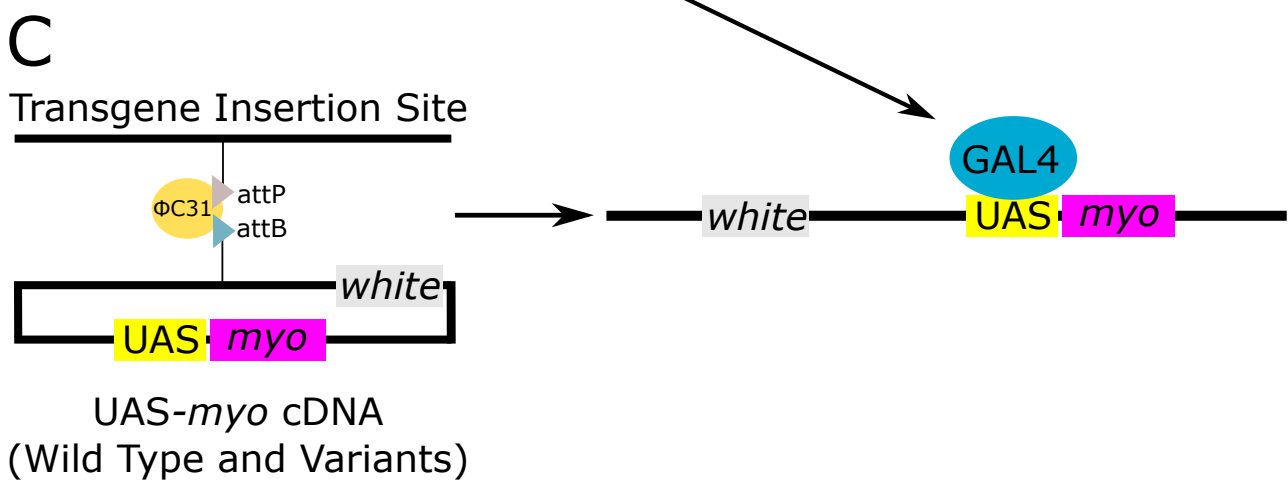

**C**

| Human <i>GDF11</i> variant | Fly <i>myo</i> variant |
|----------------------------|------------------------|
| R295P                      | R489P                  |
| E306K                      | E500K                  |
| Y336*                      | F530*                  |

Supplement: NIHMS1717830-supplement-Figure_S4.pdf [file NIHMS1717830-supplement-Figure_S4.pdf]
